# Supplementary material for: Geographic variation in tobacco use in India: a population-based multilevel cross-sectional study
Source: PubMed Central journal article supplement — BMJ Open. 2020 Jun 21;10(6):e033178. doi: 10.1136/bmjopen-2019-033178 (PMC7307551; doi:10.1136/bmjopen-2019-033178), 2020-06-21
Supplement: bmjopen-2019-033178supp001.pdf [file bmjopen-2019-033178supp001.pdf]

# Supplementary Appendix

## Contents

|                                                                                                                                                                              |    |
|------------------------------------------------------------------------------------------------------------------------------------------------------------------------------|----|
| Prevalence and 95% confidence intervals of any tobacco use by local areas .....                                                                                              | 2  |
| Prevalence and 95% confidence intervals of cigarette smoking by local areas.....                                                                                             | 3  |
| Prevalence and 95% confidence intervals of bidi smoking by local areas .....                                                                                                 | 4  |
| Prevalence and 95% confidence intervals of SLT use by local areas .....                                                                                                      | 5  |
| Prevalence and 95% confidence intervals of Dual use by local areas .....                                                                                                     | 6  |
| Odds ratios for any tobacco use obtained from multilevel multivariable logistic regression models...                                                                         | 7  |
| Odds ratios for cigarette smoking obtained from multilevel multivariable logistic regression models                                                                          | 9  |
| Odds ratios for bidi smoking obtained from multilevel multivariable logistic regression models .....                                                                         | 11 |
| Odds ratios for smokeless tobacco use obtained from multilevel multivariable logistic regression models .....                                                                | 13 |
| Odds ratios for dual use obtained from multilevel multivariable logistic regression models .....                                                                             | 15 |
| Area under the receiver operating characteristic (AU-ROC) curve for <i>cigarette smoking</i> plotted separately for single and multilevel logistic regression models .....   | 17 |
| Area under the receiver operating characteristic (AU-ROC) curve for <i>bidi smoking</i> plotted separately for single and multilevel logistic regression models .....        | 18 |
| Area under the receiver operating characteristic (AU-ROC) curve for <i>SLT use</i> plotted separately for single and multilevel logistic regression models .....             | 19 |
| Area under the receiver operating characteristic (AU-ROC) curve for <i>dual use</i> plotted separately for single and multilevel logistic regression models .....            | 20 |
| Table showing intraclass correlation coefficients obtained from three level hierarchical models with individual nested within city-wards/villages nested within states ..... | 21 |

Prevalence and 95% confidence intervals of any tobacco use by local areas

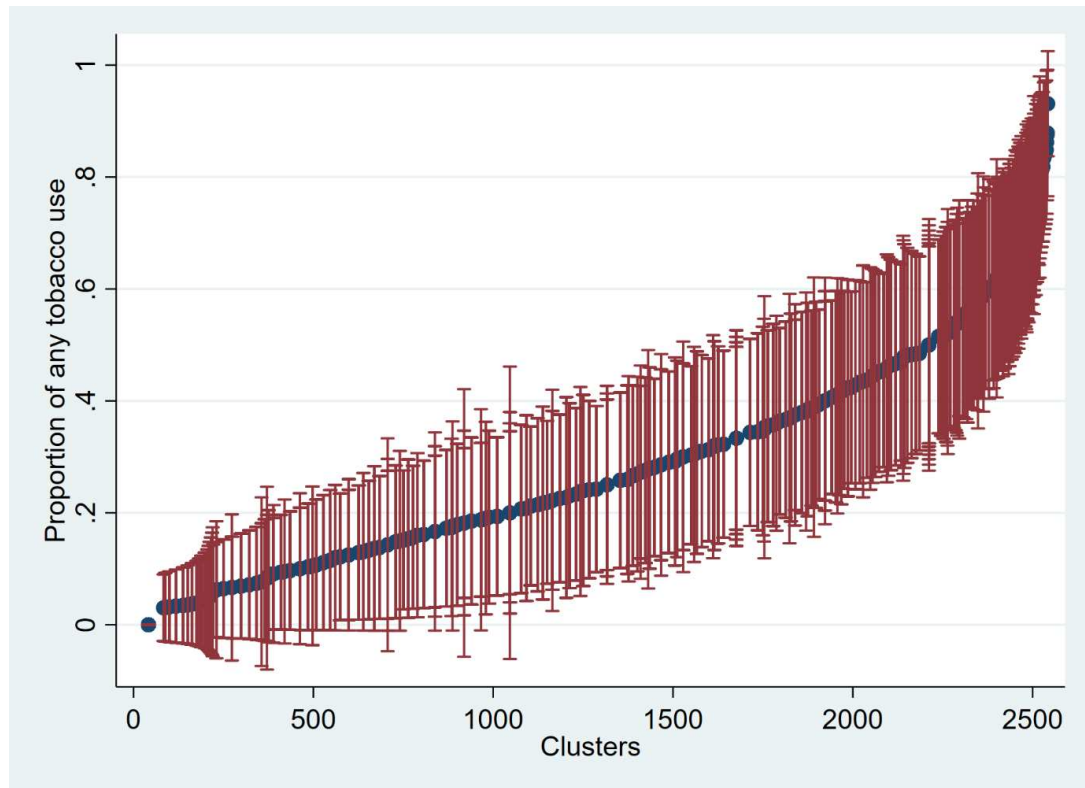

### Prevalence and 95% confidence intervals of cigarette smoking by local areas

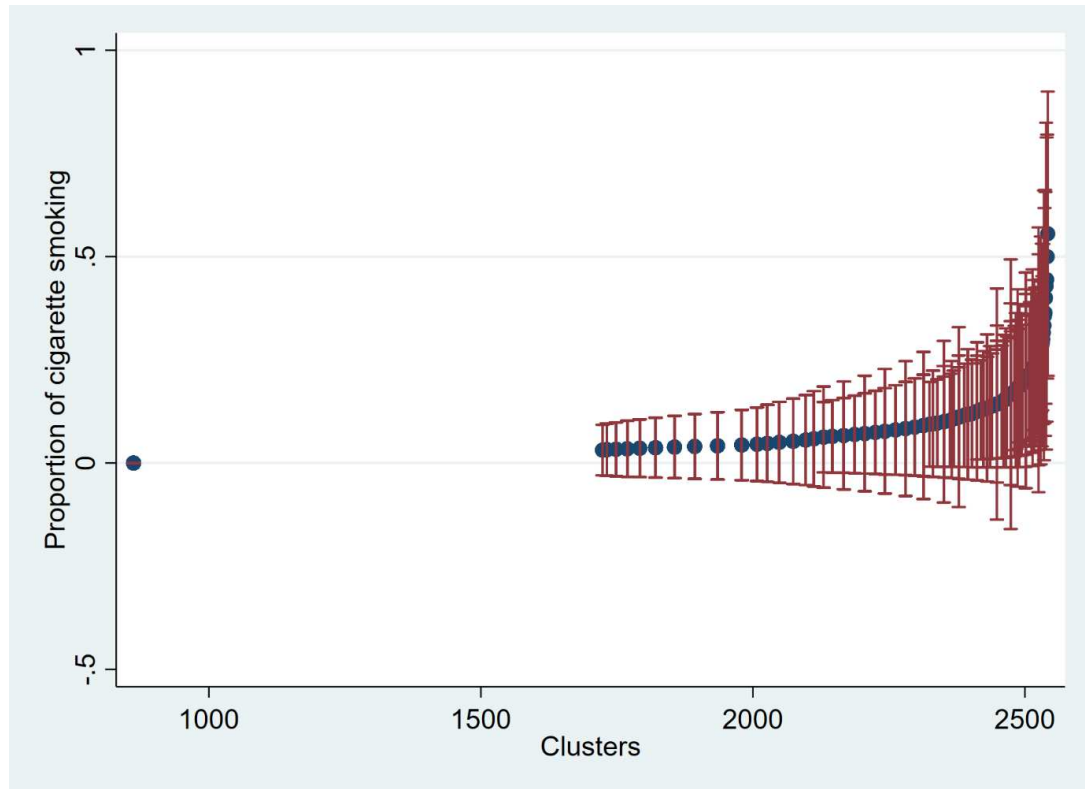

Prevalence and 95% confidence intervals of bidi smoking by local areas

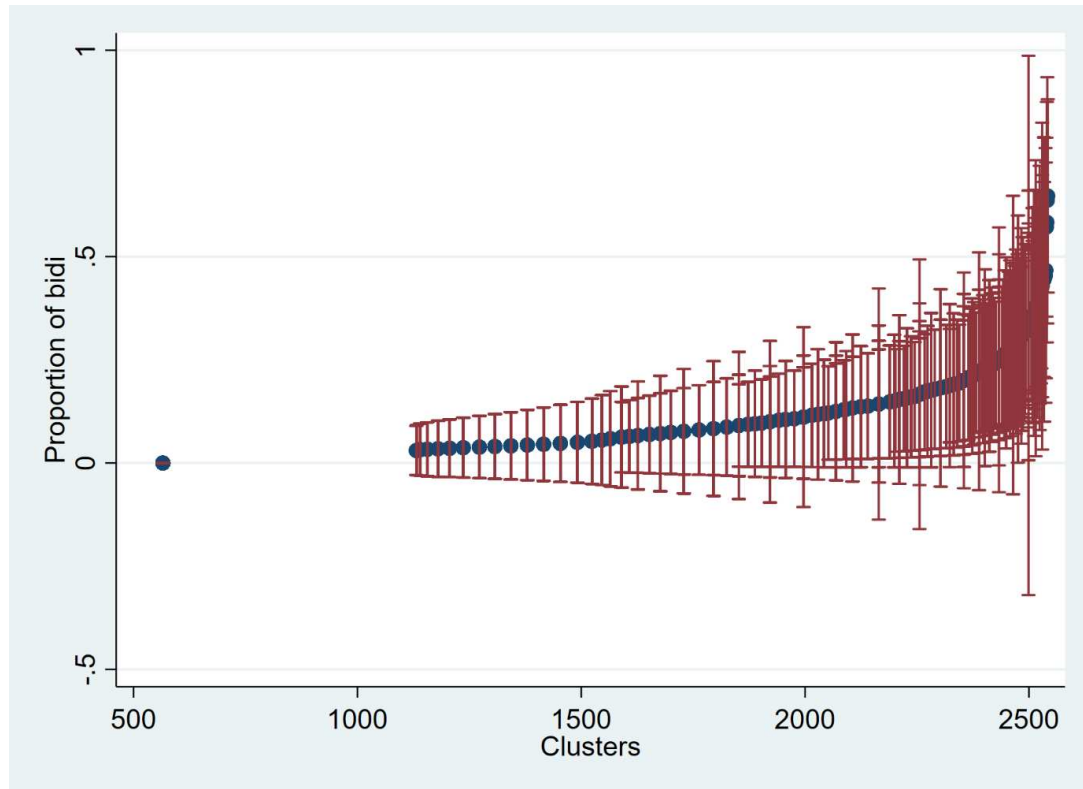

## Prevalence and 95% confidence intervals of SLT use by local areas

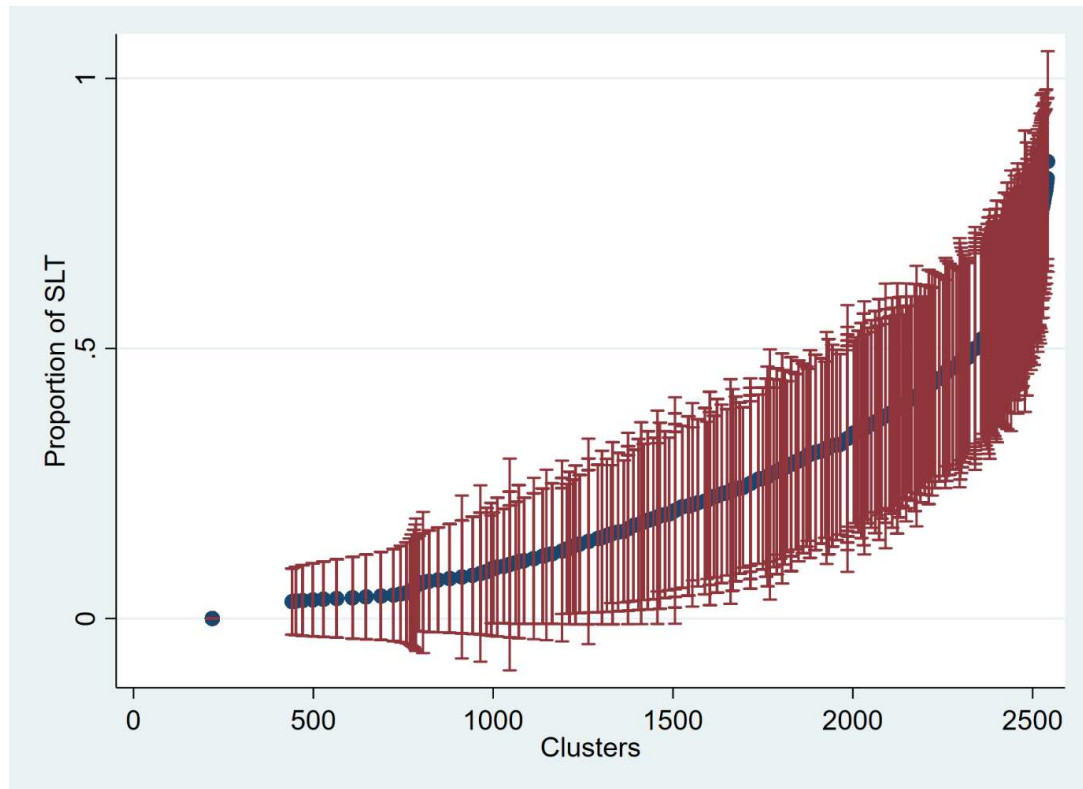

## Prevalence and 95% confidence intervals of Dual use by local areas

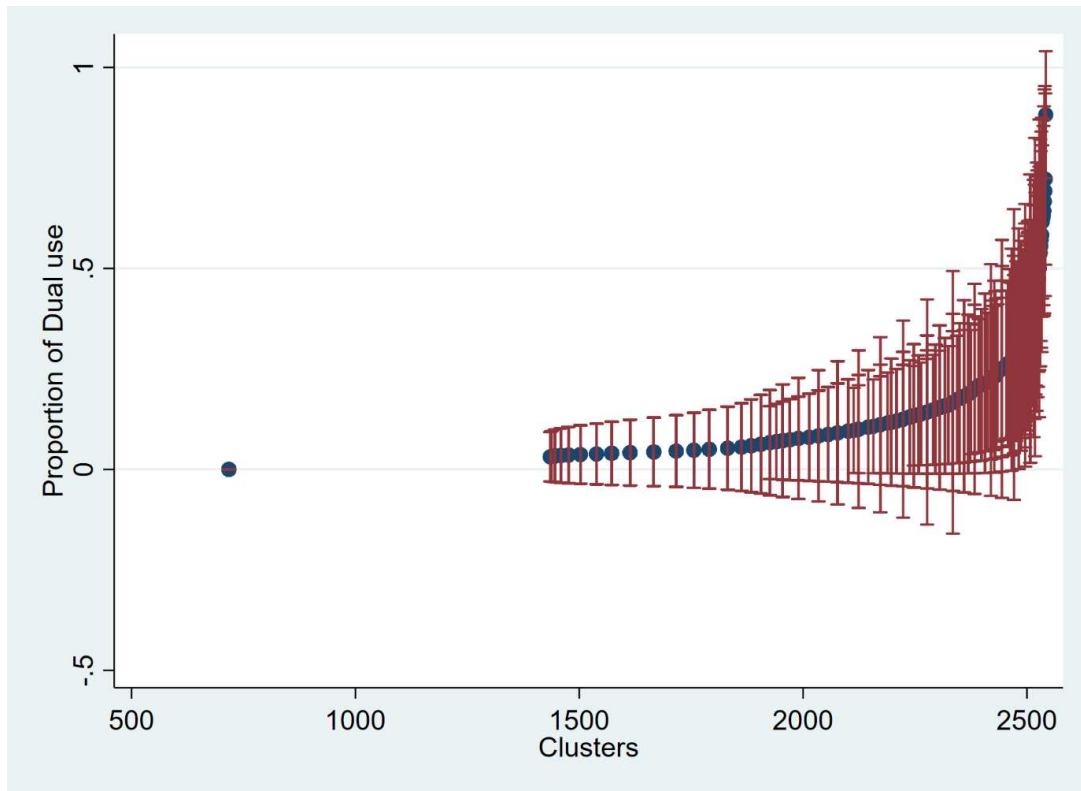

## Odds ratios for any tobacco use obtained from multilevel multivariable logistic regression models

| Covariates        | Categories                  | Odds Ratio | 95% CI |       |
|-------------------|-----------------------------|------------|--------|-------|
| Age               |                             | 1.02       | 1.02   | 1.03  |
| Sex               | Male                        |            |        |       |
|                   | Female                      | 0.23       | 0.21   | 0.24  |
| Wealth            | Poorer                      |            |        |       |
|                   | Poor                        | 0.85       | 0.81   | 0.90  |
|                   | Middle                      | 0.74       | 0.69   | 0.80  |
|                   | Rich                        | 0.58       | 0.53   | 0.63  |
|                   | Richer                      | 0.43       | 0.40   | 0.48  |
| Education         | No formal education         |            |        |       |
|                   | Less than primary           | 0.86       | 0.80   | 0.92  |
|                   | Primary less than secondary | 0.68       | 0.64   | 0.73  |
|                   | Secondary and above         | 0.37       | 0.35   | 0.40  |
| Occupation        | Unemployed                  |            |        |       |
|                   | Labourer                    | 1.92       | 1.74   | 2.12  |
|                   | Housewife/ Retired/ Student | 0.66       | 0.60   | 0.73  |
|                   | Self                        | 1.54       | 1.40   | 1.70  |
|                   | Private                     | 1.53       | 1.37   | 1.72  |
|                   | Government                  | 1.14       | 1.00   | 1.30  |
| Area of residence | Urban                       |            |        |       |
|                   | Rural                       | 1.11       | 1.04   | 1.19  |
| States            | Jammu & Kashmir             |            |        |       |
|                   | Himachal Pradesh            | 0.81       | 0.64   | 1.03  |
|                   | Punjab                      | 0.71       | 0.55   | 0.90  |
|                   | Chandigarh                  | 0.73       | 0.56   | 0.94  |
|                   | Uttarakhand                 | 1.44       | 1.15   | 1.81  |
|                   | Haryana                     | 1.20       | 0.95   | 1.52  |
|                   | Delhi                       | 1.18       | 0.92   | 1.51  |
|                   | Rajasthan                   | 1.06       | 0.85   | 1.32  |
|                   | Uttar Pradesh               | 2.34       | 1.90   | 2.88  |
|                   | Chhattisgarh                | 3.06       | 2.43   | 3.86  |
|                   | Madhya Pradesh              | 1.78       | 1.44   | 2.21  |
|                   | West Bengal                 | 1.92       | 1.55   | 2.39  |
|                   | Jharkhand                   | 2.48       | 1.96   | 3.13  |
|                   | Odisha                      | 3.87       | 3.06   | 4.90  |
|                   | Bihar                       | 1.16       | 0.94   | 1.45  |
|                   | Sikkim                      | 0.86       | 0.66   | 1.12  |
|                   | Arunachal Pradesh           | 3.74       | 2.90   | 4.82  |
|                   | Nagaland                    | 5.06       | 3.94   | 6.48  |
|                   | Manipur                     | 9.46       | 7.37   | 12.14 |
|                   | Mizoram                     | 4.64       | 3.61   | 5.95  |
| Tripura           | 11.87                       | 9.21       | 15.29  |       |
| Meghalaya         | 3.06                        | 2.38       | 3.92   |       |
| Assam             | 4.36                        | 3.52       | 5.41   |       |
| Gujarat           | 1.26                        | 1.01       | 1.58   |       |
| Maharashtra       | 1.39                        | 1.12       | 1.72   |       |

|  |                |      |      |      |
|--|----------------|------|------|------|
|  | Goa            | 0.44 | 0.34 | 0.58 |
|  | Andhra Pradesh | 0.50 | 0.39 | 0.63 |
|  | Telangana      | 0.68 | 0.53 | 0.87 |
|  | Karnataka      | 1.04 | 0.84 | 1.30 |
|  | Kerala         | 0.57 | 0.44 | 0.73 |
|  | Tamil Nadu     | 0.80 | 0.64 | 1.00 |
|  | Puducherry     | 0.53 | 0.41 | 0.68 |



## Odds ratios for cigarette smoking obtained from multilevel multivariable logistic regression models

| Covariates        | Categories                  | Odds Ratio | 95% CI |      |
|-------------------|-----------------------------|------------|--------|------|
| Age               |                             | 1.01       | 1.00   | 1.01 |
| Sex               | Male                        | 0.03       | 0.02   | 0.04 |
|                   | Female                      |            |        |      |
| Wealth            | Poorer                      |            |        |      |
|                   | Poor                        | 1.31       | 1.03   | 1.68 |
|                   | Middle                      | 1.80       | 1.38   | 2.35 |
|                   | Rich                        | 1.86       | 1.40   | 2.46 |
|                   | Richer                      | 1.80       | 1.36   | 2.40 |
| Education         | No formal education         |            |        |      |
|                   | Less than primary           | 1.14       | 0.86   | 1.51 |
|                   | Primary less than secondary | 1.24       | 0.98   | 1.56 |
|                   | Secondary and above         | 1.02       | 0.81   | 1.30 |
| Occupation        | Unemployed                  |            |        |      |
|                   | Labourer                    | 1.70       | 1.24   | 2.34 |
|                   | Housewife/ Retired/ Student | 0.51       | 0.37   | 0.72 |
|                   | Self                        | 1.51       | 1.12   | 2.05 |
|                   | Private                     | 1.54       | 1.11   | 2.14 |
|                   | Government                  | 1.32       | 0.94   | 1.87 |
| Area of residence | Urban                       |            |        |      |
|                   | Rural                       | 0.66       | 0.56   | 0.77 |
| States            | Jammu & Kashmir             |            |        |      |
|                   | Himachal Pradesh            | 0.13       | 0.08   | 0.21 |
|                   | Punjab                      | 0.08       | 0.04   | 0.13 |
|                   | Chandigarh                  | 0.10       | 0.06   | 0.16 |
|                   | Uttarakhand                 | 0.16       | 0.10   | 0.26 |
|                   | Haryana                     | 0.06       | 0.03   | 0.10 |
|                   | Delhi                       | 0.13       | 0.09   | 0.21 |
|                   | Rajasthan                   | 0.05       | 0.03   | 0.09 |
|                   | Uttar Pradesh               | 0.05       | 0.03   | 0.10 |
|                   | Chhattisgarh                | 0.03       | 0.01   | 0.09 |
|                   | Madhya Pradesh              | 0.04       | 0.02   | 0.08 |
|                   | West Bengal                 | 0.19       | 0.12   | 0.30 |
|                   | Jharkhand                   | 0.21       | 0.12   | 0.37 |
|                   | Odisha                      | 0.09       | 0.04   | 0.19 |
|                   | Bihar                       | 0.02       | 0.01   | 0.06 |
|                   | Sikkim                      | 0.46       | 0.30   | 0.70 |
|                   | Arunachal Pradesh           | 0.59       | 0.37   | 0.96 |
|                   | Nagaland                    | 0.07       | 0.03   | 0.16 |
|                   | Manipur                     | 1.05       | 0.69   | 1.60 |
|                   | Mizoram                     | 0.58       | 0.39   | 0.86 |
|                   | Tripura                     | 0.99       | 0.63   | 1.58 |
|                   | Meghalaya                   | 0.58       | 0.38   | 0.90 |
|                   | Assam                       | 0.22       | 0.13   | 0.35 |
|                   | Gujarat                     | 0.03       | 0.02   | 0.06 |

|  |                |      |      |      |
|--|----------------|------|------|------|
|  | Maharashtra    | 0.07 | 0.04 | 0.11 |
|  | Goa            | 0.06 | 0.03 | 0.11 |
|  | Andhra Pradesh | 0.21 | 0.14 | 0.32 |
|  | Telangana      | 0.27 | 0.18 | 0.42 |
|  | Karnataka      | 0.16 | 0.10 | 0.24 |
|  | Kerala         | 0.26 | 0.17 | 0.39 |
|  | Tamil Nadu     | 0.27 | 0.19 | 0.38 |
|  | Puducherry     | 0.29 | 0.20 | 0.42 |

## Odds ratios for bidi smoking obtained from multilevel multivariable logistic regression models

| Covariates        | Categories                  | Odds Ratio | 95% CI |      |
|-------------------|-----------------------------|------------|--------|------|
| Age               |                             | 1.04       | 1.03   | 1.04 |
| Sex               | Male                        | 0.04       | 0.04   | 0.05 |
|                   | Female                      |            |        |      |
| Wealth            | Poorer                      |            |        |      |
|                   | Poor                        | 0.82       | 0.73   | 0.92 |
|                   | Middle                      | 0.67       | 0.57   | 0.78 |
|                   | Rich                        | 0.45       | 0.37   | 0.54 |
|                   | Richer                      | 0.28       | 0.23   | 0.35 |
| Education         | No formal education         |            |        |      |
|                   | Less than primary           | 0.79       | 0.69   | 0.91 |
|                   | Primary less than secondary | 0.48       | 0.43   | 0.55 |
|                   | Secondary and above         | 0.18       | 0.15   | 0.21 |
| Occupation        | Unemployed                  |            |        |      |
|                   | Labourer                    | 2.45       | 2.02   | 2.96 |
|                   | Housewife/ Retired/ Student | 0.73       | 0.59   | 0.90 |
|                   | Self                        | 1.87       | 1.55   | 2.26 |
|                   | Private                     | 1.34       | 1.06   | 1.70 |
|                   | Government                  | 1.47       | 1.10   | 1.95 |
| Area of residence | Urban                       |            |        |      |
|                   | Rural                       | 1.63       | 1.41   | 1.89 |
| States            | Jammu & Kashmir             |            |        |      |
|                   | Himachal Pradesh            | 3.24       | 2.19   | 4.78 |
|                   | Punjab                      | 1.18       | 0.77   | 1.82 |
|                   | Chandigarh                  | 2.49       | 1.59   | 3.90 |
|                   | Uttarakhand                 | 3.71       | 2.51   | 5.49 |
|                   | Haryana                     | 4.69       | 3.18   | 6.92 |
|                   | Delhi                       | 2.38       | 1.51   | 3.75 |
|                   | Rajasthan                   | 1.40       | 0.96   | 2.03 |
|                   | Uttar Pradesh               | 1.32       | 0.90   | 1.94 |
|                   | Chhattisgarh                | 0.53       | 0.32   | 0.86 |
|                   | Madhya Pradesh              | 0.83       | 0.56   | 1.24 |
|                   | West Bengal                 | 1.98       | 1.36   | 2.89 |
|                   | Jharkhand                   | 0.27       | 0.15   | 0.50 |
|                   | Odisha                      | 0.37       | 0.22   | 0.63 |
|                   | Bihar                       | 0.32       | 0.21   | 0.50 |
|                   | Sikkim                      | 0.15       | 0.08   | 0.29 |
|                   | Arunachal Pradesh           | 0.50       | 0.28   | 0.89 |
|                   | Nagaland                    | 1.26       | 0.77   | 2.07 |
|                   | Manipur                     | 0.26       | 0.13   | 0.53 |
|                   | Mizoram                     | 0.11       | 0.05   | 0.25 |
|                   | Tripura                     | 4.73       | 3.02   | 7.42 |
|                   | Meghalaya                   | 2.29       | 1.49   | 3.52 |
|                   | Assam                       | 0.83       | 0.54   | 1.26 |

|  |                |      |      |      |
|--|----------------|------|------|------|
|  | Gujarat        | 0.93 | 0.62 | 1.39 |
|  | Maharashtra    | 0.25 | 0.16 | 0.41 |
|  | Goa            | 0.27 | 0.14 | 0.50 |
|  | Andhra Pradesh | 0.51 | 0.33 | 0.78 |
|  | Telangana      | 0.52 | 0.33 | 0.81 |
|  | Karnataka      | 0.61 | 0.40 | 0.91 |
|  | Kerala         | 0.42 | 0.25 | 0.69 |
|  | Tamil Nadu     | 0.62 | 0.41 | 0.93 |
|  | Puducherry     | 0.23 | 0.13 | 0.41 |

## Odds ratios for smokeless tobacco use obtained from multilevel multivariable logistic regression models

| Covariates        | Categories                  | Odds Ratio | 95% CI |       |
|-------------------|-----------------------------|------------|--------|-------|
| Age               |                             | 1.02       | 1.02   | 1.02  |
| Sex               | Male                        |            |        |       |
|                   | Female                      | 0.44       | 0.41   | 0.46  |
| Wealth            | Poorer                      |            |        |       |
|                   | Poor                        | 0.88       | 0.83   | 0.94  |
|                   | Middle                      | 0.75       | 0.69   | 0.82  |
|                   | Rich                        | 0.56       | 0.50   | 0.62  |
| Education         | Richer                      | 0.38       | 0.34   | 0.43  |
|                   | No formal education         |            |        |       |
|                   | Less than primary           | 0.90       | 0.83   | 0.97  |
|                   | Primary less than secondary | 0.74       | 0.69   | 0.79  |
| Occupation        | Secondary and above         | 0.43       | 0.39   | 0.46  |
|                   | Unemployed                  |            |        |       |
|                   | Labourer                    | 1.81       | 1.61   | 2.04  |
|                   | Housewife/ Retired/ Student | 0.67       | 0.60   | 0.76  |
| Area of residence | Self                        | 1.46       | 1.30   | 1.64  |
|                   | Private                     | 1.56       | 1.36   | 1.79  |
|                   | Government                  | 0.99       | 0.84   | 1.17  |
|                   | Urban                       |            |        |       |
| States            | Rural                       | 1.09       | 1.01   | 1.19  |
|                   | Jammu & Kashmir             |            |        |       |
| States            | Himachal Pradesh            | 0.49       | 0.31   | 0.76  |
|                   | Punjab                      | 1.97       | 1.37   | 2.82  |
|                   | Chandigarh                  | 1.23       | 0.82   | 1.84  |
|                   | Uttarakhand                 | 2.35       | 1.66   | 3.34  |
|                   | Haryana                     | 1.39       | 0.95   | 2.03  |
|                   | Delhi                       | 2.64       | 1.83   | 3.82  |
|                   | Rajasthan                   | 3.03       | 2.19   | 4.19  |
|                   | Uttar Pradesh               | 8.56       | 6.27   | 11.67 |
|                   | Chhattisgarh                | 14.66      | 10.56  | 20.35 |
|                   | Madhya Pradesh              | 7.32       | 5.34   | 10.04 |
|                   | West Bengal                 | 5.72       | 4.15   | 7.87  |
|                   | Jharkhand                   | 10.67      | 7.66   | 14.85 |
|                   | Odisha                      | 17.56      | 12.62  | 24.42 |
|                   | Bihar                       | 5.49       | 4.01   | 7.53  |
|                   | Sikkim                      | 2.21       | 1.51   | 3.23  |
|                   | Arunachal Pradesh           | 11.81      | 8.29   | 16.82 |
|                   | Nagaland                    | 18.80      | 13.30  | 26.57 |
|                   | Manipur                     | 36.81      | 26.07  | 51.99 |
|                   | Mizoram                     | 17.94      | 12.69  | 25.36 |
| Tripura           | 40.00                       | 28.21      | 56.70  |       |

|  |                |       |       |       |
|--|----------------|-------|-------|-------|
|  | Meghalaya      | 7.70  | 5.40  | 10.98 |
|  | Assam          | 17.68 | 12.92 | 24.20 |
|  | Gujarat        | 5.31  | 3.85  | 7.32  |
|  | Maharashtra    | 6.81  | 4.98  | 9.31  |
|  | Goa            | 1.76  | 1.21  | 2.56  |
|  | Andhra Pradesh | 1.14  | 0.79  | 1.65  |
|  | Telangana      | 2.05  | 1.44  | 2.92  |
|  | Karnataka      | 3.63  | 2.62  | 5.02  |
|  | Kerala         | 1.12  | 0.76  | 1.65  |
|  | Tamil Nadu     | 2.15  | 1.54  | 3.00  |
|  | Puducherry     | 1.18  | 0.81  | 1.72  |

## Odds ratios for dual use obtained from multilevel multivariable logistic regression models

| Covariates | Categories                  | Odds Ratio | 95% CI |       |
|------------|-----------------------------|------------|--------|-------|
| Age        |                             | 1.01       | 1.01   | 1.01  |
| Sex        | Male                        |            |        |       |
|            | Female                      | 0.05       | 0.04   | 0.05  |
| Wealth     | Poorer                      |            |        |       |
|            | Poor                        | 0.85       | 0.74   | 0.98  |
|            | Middle                      | 0.74       | 0.61   | 0.89  |
|            | Rich                        | 0.64       | 0.51   | 0.80  |
|            | Richer                      | 0.45       | 0.35   | 0.58  |
| Education  | No formal education         |            |        |       |
|            | Less than primary           | 0.82       | 0.69   | 0.98  |
|            | Primary less than secondary | 0.62       | 0.54   | 0.73  |
|            | Secondary and above         | 0.26       | 0.22   | 0.31  |
| Occupation | Unemployed                  |            |        |       |
|            | Labourer                    | 2.18       | 1.72   | 2.77  |
|            | Housewife/ Retired/ Student | 0.37       | 0.28   | 0.49  |
|            | Self                        | 1.41       | 1.11   | 1.78  |
|            | Private                     | 1.58       | 1.20   | 2.08  |
|            | Government                  | 1.12       | 0.81   | 1.56  |
|            | Area of residence           | Urban      |        |       |
|            | Rural                       | 1.09       | 0.92   | 1.29  |
| States     | Jammu & Kashmir             |            |        |       |
|            | Himachal Pradesh            | 1.00       | 0.49   | 2.04  |
|            | Punjab                      | 1.37       | 0.70   | 2.68  |
|            | Chandigarh                  | 1.34       | 0.65   | 2.74  |
|            | Uttarakhand                 | 5.60       | 3.07   | 10.19 |
|            | Haryana                     | 2.03       | 1.06   | 3.89  |
|            | Delhi                       | 2.77       | 1.43   | 5.36  |
|            | Rajasthan                   | 1.45       | 0.79   | 2.65  |
|            | Uttar Pradesh               | 7.29       | 4.17   | 12.74 |
|            | Chhattisgarh                | 2.06       | 1.06   | 3.99  |
|            | Madhya Pradesh              | 2.88       | 1.61   | 5.16  |
|            | West Bengal                 | 3.06       | 1.70   | 5.52  |
|            | Jharkhand                   | 7.41       | 4.04   | 13.57 |
|            | Odisha                      | 4.55       | 2.44   | 8.48  |
|            | Bihar                       | 1.73       | 0.95   | 3.14  |
|            | Sikkim                      | 2.06       | 1.05   | 4.06  |
|            | Arunachal Pradesh           | 18.94      | 10.26  | 34.97 |
|            | Nagaland                    | 17.87      | 9.68   | 33.00 |
|            | Manipur                     | 28.55      | 15.51  | 52.53 |
|            | Mizoram                     | 2.81       | 1.44   | 5.49  |
| Tripura    | 22.80                       | 12.21      | 42.58  |       |
| Meghalaya  | 2.09                        | 1.07       | 4.08   |       |
| Assam      | 7.16                        | 4.04       | 12.69  |       |
| Gujarat    | 1.23                        | 0.66       | 2.30   |       |

|  |                |      |      |      |
|--|----------------|------|------|------|
|  | Maharashtra    | 0.59 | 0.30 | 1.17 |
|  | Goa            | 0.30 | 0.11 | 0.81 |
|  | Andhra Pradesh | 0.23 | 0.10 | 0.53 |
|  | Telangana      | 0.21 | 0.08 | 0.52 |
|  | Karnataka      | 1.33 | 0.72 | 2.46 |
|  | Kerala         | 1.19 | 0.59 | 2.37 |
|  | Tamil Nadu     | 0.65 | 0.34 | 1.27 |
|  | Puducherry     | 0.40 | 0.18 | 0.89 |



Area under the receiver operating characteristic (AU-ROC) curve for *cigarette smoking* plotted separately for single and multilevel logistic regression models

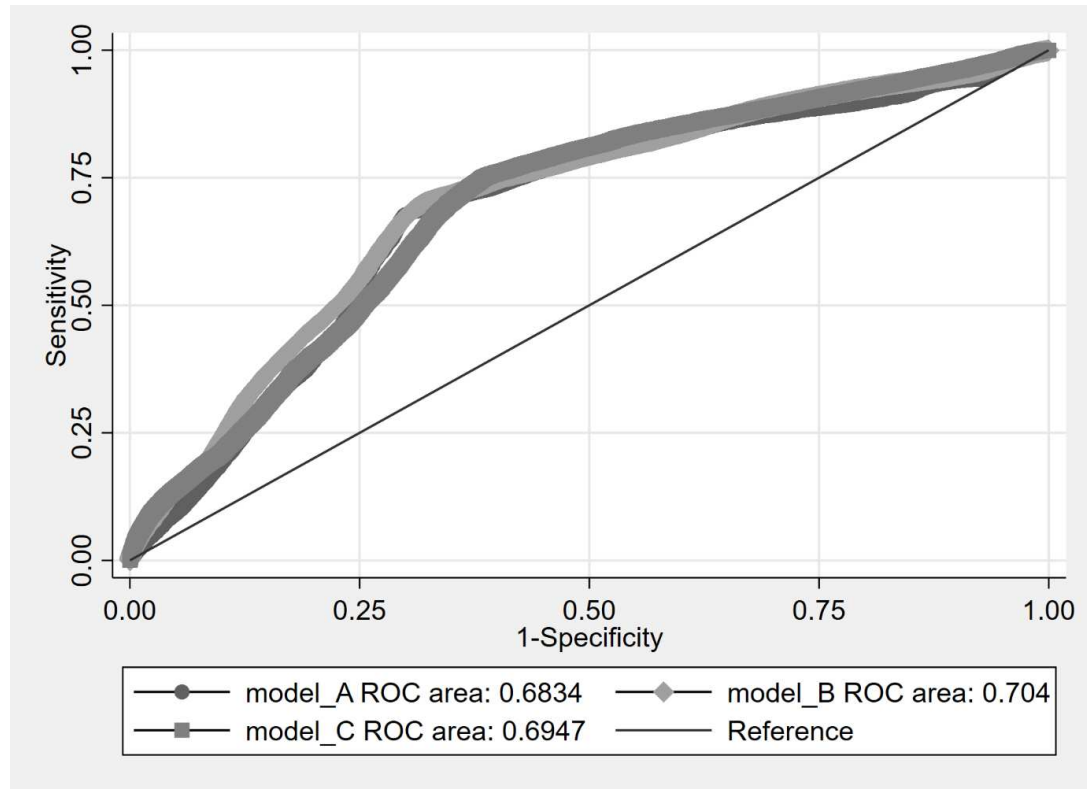

Area under the receiver operating characteristic (AU-ROC) curve for *bidi smoking* plotted separately for single and multilevel logistic regression models

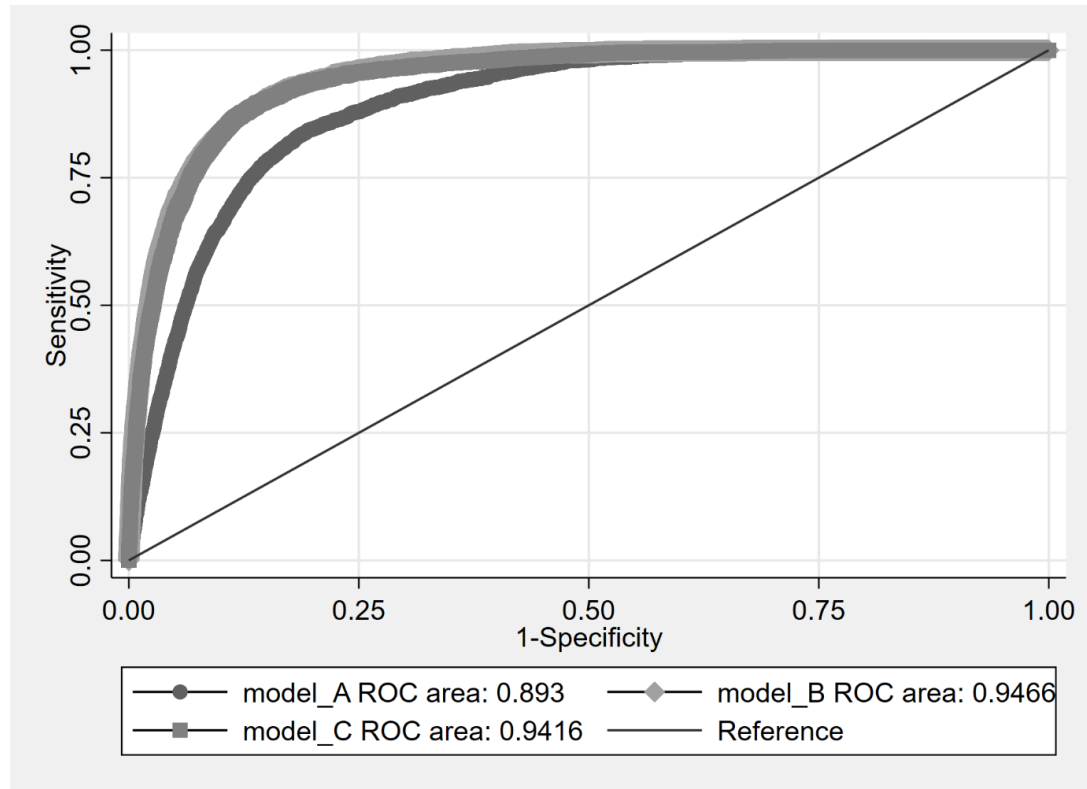

Area under the receiver operating characteristic (AU-ROC) curve for *SLT use* plotted separately for single and multilevel logistic regression models

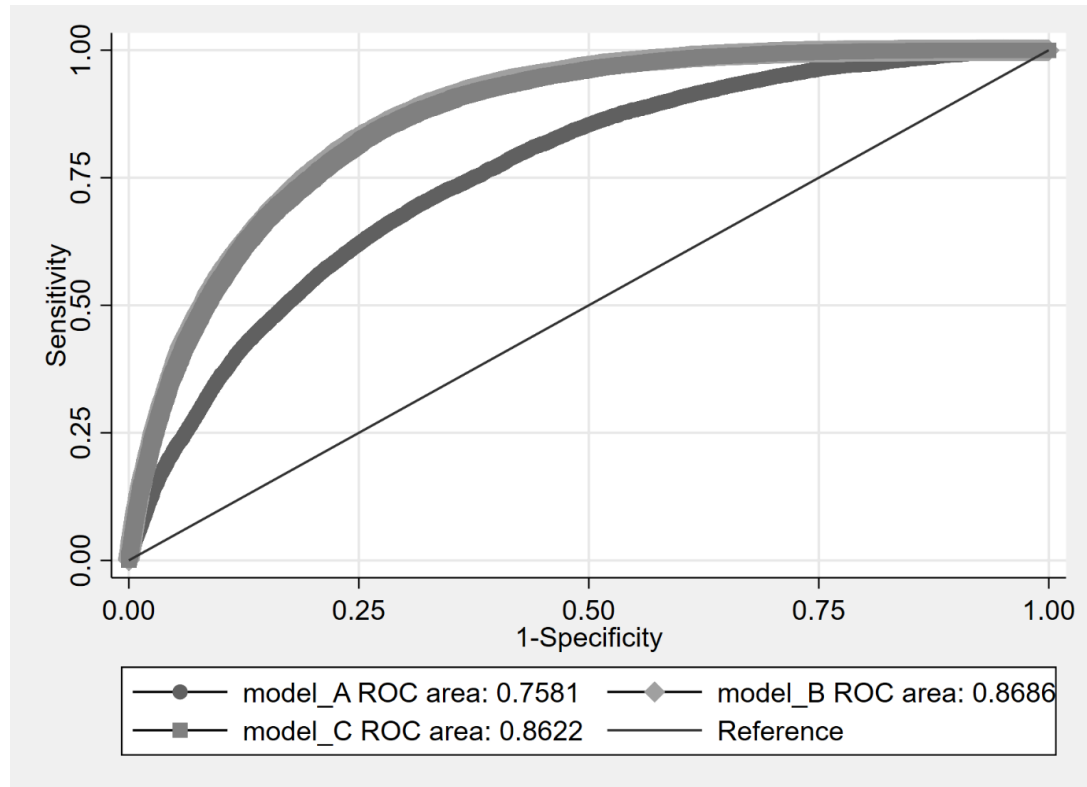

Area under the receiver operating characteristic (AU-ROC) curve for *dual use* plotted separately for single and multilevel logistic regression models

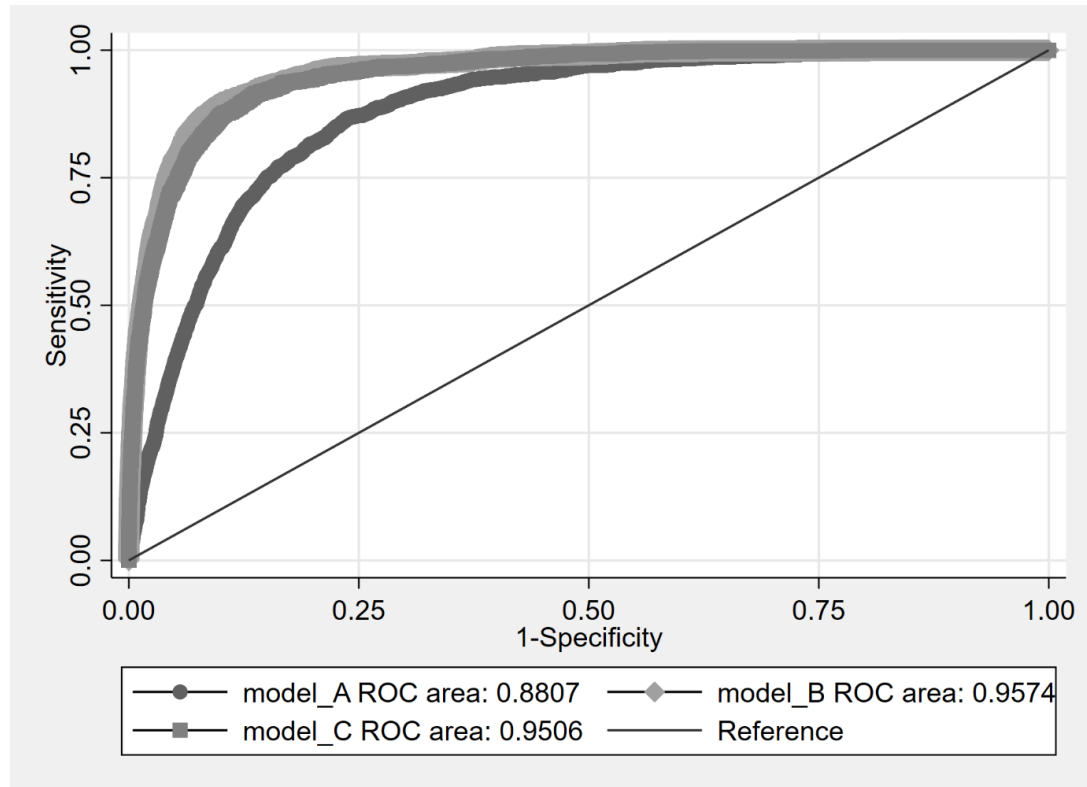

Table showing intraclass correlation coefficients obtained from three level hierarchical models with individual nested within city-wards/villages nested within states

|                   |                                 | Null Model<br>ICC<br>95% CI | Full model<br>ICC<br>95% CI |
|-------------------|---------------------------------|-----------------------------|-----------------------------|
| Any tobacco use   | State                           | 17%<br>(11%, 25%)           | 17%<br>(11%, 25%)           |
|                   | City ward/ village within state | 23%<br>(17%, 30%)           | 23%<br>(17%, 30%)           |
| Cigarette smoking | State                           | 23%<br>(15%, 34%)           | 22%<br>(14%, 32%)           |
|                   | City ward/ village within state | 33%<br>(25%, 42%)           | 33%<br>(26%, 42%)           |
| Bidi smoking      | State                           | 16%<br>(11%, 25%)           | 19%<br>(13%, 29%)           |
|                   | City ward/ village within state | 30%<br>(24%, 36%)           | 33%<br>(26%, 40%)           |
| SLT use           | State                           | 28%<br>(20%, 40%)           | 26%<br>(18%, 36%)           |
|                   | City ward/ village within state | 36%<br>(28%, 46%)           | 33%<br>(25%, 42%)           |
| Dual use          | State                           | 27%<br>(18%, 38%)           | 26%<br>(18%, 37%)           |
|                   | City ward/ village within state | 39%<br>(31%, 48%)           | 43%<br>(36%, 51%)           |

ICC: Intra-class correlation

Null model: Intercept only

Full model: Age, sex, education, occupation, wealth and area of residence

### Interpretation

**Example any tobacco use:** Conditioned on covariates (age, sex, education, occupation, wealth and area of residence) any tobacco use is highly correlated within states (ICC: 17%). Within the same cityward/ village and state, this correlation was even higher (ICC: 23%).
